# Supplementary material for: SES1 is vital for seedling establishment and post-germination growth under high-potassium stress conditions in Arabidopsis thaliana
Source: PeerJ journal article supplement (doi:10.7717/peerj.14282), 2022-10-31
Supplement: raw_data_Figure1_and_2.zip [file raw_data_Figure1_and_2.zip]

## Sheet: Seedlings establishment rate %
	WT			ses1-1			ses1-2			COM2			OE1			OE5
1/2 MS	100	100	100	100	100	100	100	100	100	100	100	100	100	100	100	100	100	100
125 mM KCl	94	97	94	94	100	100	27	0	14	100	100	100	100	100	100	100	100	100
125 mM KNO3	89	100	100	6	3	0	0	0	0	100	100	89	100	100	100	100	100	100
125 mM NaCl	100	100	100	100	100	100	100	100	100	100	100	100	100	100	100	100	100	100
125 mM NaNO3	100	100	100	100	100	100	100	100	100	100	100	100	100	100	100	100	100	100
20 µM K+	100	100	100	100	100	100	100	100	100	100	100	100
	125 mM KCl(ses1-2 VS WT)	125 mM KNO3 (ses1-1 VS WT)	125 mM KNO3 (ses1-2 VS WT)
p value	0.000492238	2.11153e-05	1.24723e-05
