# Supplementary material for: SES1 is vital for seedling establishment and post-germination growth under high-potassium stress conditions in Arabidopsis thaliana
Source: PeerJ journal article supplement (doi:10.7717/peerj.14282), 2022-10-31
Supplement: raw_data_Figure_3_to_Figure_7.zip [file raw_data_Figure_3_to_Figure_7.zip]

## Sheet: Relative expression
	WT CK			WT 200 mM KCl			ses1-2 CK			ses1-2 200 mM KCl
	mean	SEM	n	mean	SEM	n	mean	SEM	n	mean	SEM	n
AKT2	1	0.1316	3	3.0502	0.2612	3	2.7642	0.2111	3	3.6533	0.3713	3
KAT1	1	0.0615	3	0.9116	0.1123	3	1.2326	0.1717	3	1.9428	0.2138	3
KAT2	1	0.132	3	1.9827	0.1721	3	2.8512	0.3123	3	7.0515	0.8311	3
KC1	0.5365	0.3557	3	1.9103	0.8147	3	0.4173	0.1902	3	3.357	1.5187	3
KUP2	1	0.7947	3	1.811	0.8222	3	1.4234	0.66	3	4.7133	1.3102	3
KUP3	0.3763	0.2289	3	0.0092	0.0069	3	1	0.7315	3	0.1317	0.1003	3
KUP4	0.2863	0.1952	3	1.9103	0.8123	3	2.0757	0.5327	3	11.0034	5.7574	3
KCO5	0.8679	0.4594	3	1.4809	0.5933	3	2.3442	0.5745	3	2.3187	0.9917	3
SKOR	1	0.052	3	0.4823	0.0711	3	1.1832	0.0614	3	2.8533	0.1321	3
GORK	1	0.0512	3	4.2452	0.2438	3	4.8351	0.2511	3	5.8431	0.5111	3
	WT CK			WT 200 mM KCl			ses1-2 CK			ses1-2 200 mM KCl
	mean	SEM	n	mean	SEM	n	mean	SEM	n	mean	SEM	n
UBQ10	1	0.0544	3	1.2637	0.1741	3	1.2014	0.21012	3	0.9732	0.1403	3
